# Supplementary material for: A semantic segmentation method to analyze retinal vascular parameters of diabetic nephropathy
Source: Front Med (Lausanne). 2024 Oct 24;11:1494659. doi: 10.3389/fmed.2024.1494659 (PMC11540694; doi:10.3389/fmed.2024.1494659)
Supplement: Supplementary file 1 [file Table_1.XLSX]

## Sheet: Sheet1
姓名	性别	年龄	收缩压	舒张压	体重指数（BMI）kg/m2	糖化血红蛋白（HbAlc）%	尿肌酐（umol/L）	微量白蛋白mg/L	尿白蛋白/肌酐比(ug/mg)	组别	尿酸(umol/L)	甘油三酯（TG）mmol/L	总胆固醇（TC）mmol/L	动脉外径RAOD	动脉内径RALD	动脉壁厚度AWT	动脉管壁/外径比	动脉管壁面积	动脉外径面积	动脉内径面积	动静脉	动静比（外）	动静比（内）	静脉外径RVOD	静脉脉内径RVLD	静脉壁厚度VWT	静脉管壁/外径比	静脉管壁面积	静脉外径面积	静脉内径面积	动静脉	动静比（内）	视神经纤维层厚度
白云龙	0	64	151	88	19.04	10.3	24154	75.6	27.67	1	455	1.92	6.71	94.1176	79.1176	8.5	0.0903125	3367.21	6883.65	3516.44	动脉	0.695652	0.5875	135.294	117.647	6	0.0443478	3708.91	13721.9	10013	静脉	0.5875
白云龙2	1	77	156	77	19.24	9.3	24054	80.6	26.67	1	388	2.92	7.71	107.353	83.8235	8	0.0745206	3618.08	8810.55	5192.47	动脉	0.8753	0.6786	122.647	113.529	6.5	0.0529976	4230.1	15283.3	11053.2	静脉	0.6786
黄会禄	0	67	139	78	25.83	7.28	4147.1	5.8	12.37	1	252.6	1.9	3.9	94.1176	79.1176	8.5	0.0903125	3109.86	6799.31	3689.45	动脉	0.810126	0.6912	116.177	100	5.5	0.0473418	3207.18	10685.6	7478.37	静脉	0.6912
江舟	1	52	135	77	30	7.3	5952.1	10	14.85	1	272.4	2.16	3.1	92.6471	73.5294	6.5	0.0701587	2871.97	6844.72	3972.75	未知	0.773956	0.68306	119.706	107.647	7.5	0.0626536	4240.92	14031.1	9790.22	未知	0.68306
江舟2	0	47	131	85	28.7	7.6	5852.1	13	15.85	1	278.4	2.63	2.1	95.5882	72.0588	8	0.0836923	2997.4	7192.91	4195.5	动脉	0.722222	0.653333	132.353	110.294	7.5	0.0566667	4083.04	13014.7	8931.66	静脉	0.653333
江舟2	0	47	131	85	28.7	7.6	5852.1	13	15.85	1	278.4	2.63	2.1	95.5882	72.0588	8	0.0836923	2997.4	7192.91	4195.5	动脉	0.722222	0.653333	132.353	110.294	7.5	0.0566667	4083.04	13014.7	8931.66	静脉	0.653333
江舟3	1	50	121	81	27.9	7.8	5942.1	8	13.85	1	292.4	4.16	3.7	103.823	83.2353	7	0.0674221	2277.25	5376.3	3099.05	动脉	1.10313	0.7963	94.1176	79.4118	5	0.053125	2091.26	6881.49	4790.22	静脉	0.7963
江舟4	0	55	129	76	21.5	8.3	5652.1	9	15.85	1	288.4	2.46	3.6	118.235	89.1176	6.5	0.0549751	2599.48	5979.67	3380.19	动脉	1.23692	0.8545	95.5882	80.8824	5	0.0523077	2311.85	7121.54	4809.69	静脉	0.8545
揭素贞	1	67	116	71	27.97	19.1	2571.5	3.8	13.7	1	175.5	0.65	3.12	105.588	83.5294	7.5	0.0710307	3060.12	6959.34	3899.22	动脉	0.897499	0.7576	117.647	97.0588	7	0.0595	3544.55	10590.4	7045.85	静脉	0.7576
刘建平	0	55	138	77	21.6	6.53	5501.4	0.4	0.64	1	282.2	1.79	4.54	101.471	77.9412	8	0.0788406	3438.58	7867.65	4429.07	动脉	0.847666	0.6386	119.706	122.059	6	0.0501228	4100.35	15326.6	11226.2	静脉	0.6386
刘建平2	0	58	146	90	33.1	7.53	5401.4	0.5	1.64	1	300.2	2.79	3.54	106.765	81.7647	8.5	0.0796143	2908.74	5942.91	3034.17	动脉	1.00833	0.6885	105.882	89.7059	5.5	0.0519444	2878.46	9385.81	6507.35	静脉	0.6885
刘建平3	1	54	133	69	22.1	6.49	5301.4	0.7	1.84	1	292.2	1.99	4.64	97.0588	75	7.5	0.0772727	3066.61	7407.01	4340.4	动脉	0.77647	0.7083	125	105.882	6.5	0.052	3689.45	12024.2	8334.77	静脉	0.7083
裘阿芬	1	69	143	75	24.3	6.31	16613	19.5	10.38	1	230.7	0.9	4.39	105.882	85.2941	7	0.0661111	3077.42	8462.37	5384.95	动脉	1.03152	0.6905	102.647	113.529	6.5	0.0633238	4176.04	15510.4	11334.3	静脉	0.6905
裘阿芬2	0	65	156	73	25.3	8.31	16813	29.5	13.38	1	241.7	0.8	3.39	98.5294	82.0588	9	0.0913433	3341.26	7352.94	4011.68	动脉	0.888594	0.6447	110.882	111.765	6.5	0.0586207	3860.29	13166.1	9305.8	静脉	0.6447
裘阿芬3	0	68	149	87	27.3	6.71	16413	20.5	17.38	1	243.7	1.7	3.39	119.118	94.1176	8.5	0.0713581	4059.26	11118.1	7058.82	动脉	1.16379	0.8421	102.353	91.7647	7	0.0683908	4145.76	13840.8	9695.07	静脉	0.8421
裘阿芬3	0	68	149	87	27.3	6.71	16413	20.5	17.38	1	243.7	1.7	3.39	119.118	94.1176	8.5	0.0713581	4059.26	11118.1	7058.82	动脉	1.16379	0.8421	102.353	91.7647	7	0.0683908	4145.76	13840.8	9695.07	静脉	0.8421
裘阿芬4	1	69	143	75	24.3	6.31	16613	19.5	15.38	1	256.7	0.6	3.39	97.0588	72.0588	8.5	0.0875758	3408.3	7394.03	3985.73	动脉	0.75	0.6533	129.412	110.294	6.5	0.0502273	3827.85	13047.1	9219.29	静脉	0.6533
裘阿芬5	1	71	147	76	27.4	6.41	16013	23.5	13.38	1	266.7	0.56	4.79	120.588	81.1765	27	0.223903	10038.9	11407.9	1368.94	动脉	0.911111	0.3733	132.353	90.2941	7.5	0.0566667	4212.8	13546.7	9333.91	静脉	0.3733
邵月芳	0	78	162	75	26.4	7.25	8452.1	21.7	23.13	1	473.8	5.22	4.39	100	82.0588	9.5	0.095	3471.02	7644.9	4173.88	动脉	0.990099	0.9074	101	79.4118	7	0.0693069	2921.71	7889.27	4967.56	静脉	0.9074
邵月芳2	1	61	175	89	30	6.25	8652.1	19.7	20.13	1	463.8	5.42	4.59	104.412	86.4706	9.5	0.0909859	4024.65	8605.1	4580.45	动脉	0.95946	0.8387	108.823	91.1765	6	0.0551352	3287.2	9474.48	6187.28	静脉	0.8387
邵月芳3	0	58	133	69	22.2	7	8452.1	20.1	22.13	1	473.8	5.52	4.99	102.647	64.7059	9.5	0.0925501	3315.31	6647.92	3332.61	动脉	1.05758	0.7857	97.0588	82.3529	5	0.0515152	2428.63	7450.26	5021.63	静脉	0.7857
邵月芳3	0	58	133	69	22.2	7	8452.1	20.1	22.13	1	473.8	5.52	4.99	102.647	64.7059	9.5	0.0925501	3315.31	6647.92	3332.61	动脉	1.05758	0.7857	97.0588	82.3529	5	0.0515152	2428.63	7450.26	5021.63	静脉	0.7857
邵月芳4	1	56	164	77	24.8	6.35	8333.1	17.7	19.13	1	363.8	4.32	4.19	86.7647	85.8824	10.5	0.121017	3339.1	5852.08	2512.98	动脉	0.951613	0.7451	91.1765	75	5.5	0.0603226	2363.75	6498.7	4134.95	静脉	0.7451
方小贵	0	60	118	65	22.31	6.98	3440.6	3.1	7.97	1	329.6	0.77	2.92	100	75	8.5	0.085	3369.38	7417.82	4048.44	动脉	0.86514	0.6071	115.588	113.529	7.5	0.0648855	4342.56	15064.9	10722.3	静脉	0.6071
方小贵2	1	64	138	77	22.2	6.68	3240.6	4.1	8.97	1	333.6	0.79	3.92	91.1765	79.1176	7.5	0.082258	2936.85	6284.6	3347.75	动脉	0.805195	0.7231	113.235	95.5882	6	0.052987	3125	10428.2	7303.2	静脉	0.7231
方小贵3	0	67	132	76	22.19	7.08	3310.6	2.9	8.27	1	344.6	0.97	4.03	96.4706	71.4706	8.5	0.0881097	2644.9	4850.78	2205.88	动脉	0.856397	0.4167	112.647	123.529	6.5	0.0577024	4227.94	15218.4	10990.5	静脉	0.4167
余龙富	1	60	144	92	26.15	5	12067.7	13.2	9.67	1	358.9	1.93	4.43	94.1176	87.6471	9	0.095625	3267.73	6714.97	3447.23	动脉	0.831168	0.7302	113.235	92.6471	7	0.0618182	3328.29	9887.54	6559.26	静脉	0.7302
余龙富2	0	63	142	94	28.65	6.6	11967.7	14.2	10.67	1	338.9	2.93	4.53	97.0588	70.5882	9	0.0927273	3401.82	7058.82	3657.01	动脉	0.88	0.7742	110.294	91.1765	6.5	0.0589333	3248.27	9794.55	6546.28	静脉	0.7742
余云良	0	61	142	76	30.12	7.4	10926.3	10.6	8.58	1	431.4	0.99	3.56	102.941	79.4118	8	0.0777143	3492.65	8222.32	4729.67	动脉	0.804598	0.7397	127.941	107.353	7	0.0547126	4028.98	13064.4	9035.47	静脉	0.7397
余云良2	1	68	145	77	25.2	7.8	10726.3	13.6	78.58	2	441.4	1.99	3.26	91.1765	72.0588	6.5	0.0712903	2794.12	6658.74	3864.62	动脉	0.953847	0.9074	95.5882	79.4118	5.5	0.0575385	2612.46	7430.8	4818.34	静脉	0.9074
余云良3	0	61	149	79	24.4	7.6	10106.3	14.6	9.58	1	433.4	2.11	4.56	105.882	82.3529	8	0.0755555	3488.32	8782.44	5294.12	动脉	0.923077	0.8615	114.706	95.5882	6.5	0.0566667	3274.22	10274.7	7000.43	静脉	0.8615
余云良3	0	61	149	79	24.4	7.6	10106.3	14.6	9.58	1	433.4	2.11	4.56	105.882	82.3529	8	0.0755555	3488.32	8782.44	5294.12	动脉	0.923077	0.8615	114.706	95.5882	6.5	0.0566667	3274.22	10274.7	7000.43	静脉	0.8615
余云良4	0	66	142	76	30.12	7.4	10926.3	10.6	8.58	1	431.4	0.99	3.66	111.765	89.7059	7.5	0.0671053	3650.52	9682.09	6031.57	动脉	0.962025	0.8971	116.177	100	5.5	0.0473418	2939.01	10296.3	7357.27	静脉	0.8971
周金花	1	61	140	79	25.89	9.7	8044.2	20.7	22.75	1	320.1	4.85	4.14	108.823	85.2941	8	0.0735135	3769.46	9262.54	5493.08	动脉	0.973684	0.9508	111.765	89.7059	7.5	0.0671053	3503.46	9842.13	6338.67	静脉	0.9508
周金花2	0	58	144	83	21.23	10.7	8104.2	21.7	23.75	1	324.1	4.9	4.44	108.823	83.8235	8.5	0.0781081	3793.25	9433.39	5640.14	动脉	0.973684	0.9194	111.765	91.1765	7	0.0626316	3475.35	9894.03	6418.68	静脉	0.9194
周金花3	1	59	130	76	23	9.1	7944.2	23.7	27.75	1	330.1	4.85	4.14	105.882	77.9412	9.5	0.0897222	3910.03	8628.89	4718.86	动脉	0.923077	0.8281	114.706	94.1176	7	0.0610256	3114.19	9742.65	6628.46	静脉	0.8281
姜金云	1	61	108	75	25.52	10.58	3246.6	4	10.89	1	219.4	1.2	4.52	113.235	89.7059	8	0.0706493	3626.73	9816.18	6189.45	动脉	1.00785	0.7922	112.353	113.235	6.5	0.0578534	3942.47	13488.3	9545.85	静脉	0.7922
姜金云2	0	81	112	67	22.49	11.58	3346.6	5	40.89	2	223.4	1.52	4.22	113.529	91.4706	7.5	0.0660622	3687.28	11083.5	7396.19	动脉	0.848352	0.8734	133.823	116.177	6	0.0448352	3754.33	13231	9476.64	静脉	0.8734
王玉红	1	49	146	109	24.13	5.45	13824.9	7.4	4.73	1	247.2	0.52	4.24	111.177	79.1176	7.5	0.0674603	3019.03	6872.84	3853.81	动脉	0.910844	0.662	122.059	104.412	6	0.0491566	3267.73	11442.5	8174.74	静脉	0.662
王玉红2	0	54	142	111	23.13	6.45	12824.9	7.1	5.73	1	244.2	0.72	3.74	101.471	76.4706	8.5	0.0837681	3540.22	8107.7	4567.47	动脉	0.873418	0.7536	116.177	101.471	5	0.043038	3047.15	10735.3	7688.15	静脉	0.7536
郑文仙	1	70	176	89	25.84	5.8	9024.5	11.2	10.97	1	334.8	1.16	2.81	128.529	72.0588	9	0.0700229	3447.23	7562.72	4115.48	动脉	1.04048	0.6806	123.529	105.882	6	0.0485714	3230.97	11407.9	8176.9	静脉	0.6806
曹金玉	1	80	141	79	23.14	7.1	3606.8	101.7	249.31	2	296.7	2.45	3.87	105.882	82.3529	8	0.0755555	3581.31	8555.36	4974.05	动脉	0.935065	0.875	113.235	94.1176	6.5	0.0574026	3354.24	10302.8	6948.53	静脉	0.875
曹金玉2	0	76	143	83	23.13	6.9	3706.8	111.7	251.31	2	276.7	2.55	3.97	97.6471	98.5294	6.5	0.0665662	3531.57	11362.5	7830.88	动脉	0.917127	0.9178	106.471	107.353	6.5	0.0610497	3987.89	12078.3	8090.4	静脉	0.9178
曹金玉2	0	76	143	83	23.13	6.9	3706.8	111.7	251.31	2	276.7	2.55	3.97	97.6471	98.5294	6.5	0.0665662	3531.57	11362.5	7830.88	动脉	0.917127	0.9178	106.471	107.353	6.5	0.0610497	3987.89	12078.3	8090.4	静脉	0.9178
曹金玉3	1	82	147	74	22.43	7.3	3506.8	131.7	254.31	2	296.7	2.45	3.87	113.235	79.7059	8	0.0706493	3598.62	9630.19	6031.57	动脉	1.07542	0.8026	105.294	111.765	8	0.0759777	4214.97	13447.2	9232.27	静脉	0.8026
陈俊萍	1	62	145	71	24.18	7.01	4556.6	41.1	79.75	2	343.8	3.64	4.8	100	72.3529	7	0.07	2616.78	7889.27	5272.49	未知	0.944444	0.878571	105.882	82.3529	8	0.0755555	3336.94	8369.38	5032.44	未知	0.878571
方秋兰	0	66	131	73	22.03	9.3	3902.7	19.9	45.08	2	373.7	1.68	5	80.8824	57.3529	9	0.111273	2419.98	4948.1	2528.11	动脉	0.774648	0.661017	104.412	86.7647	6	0.0574648	2768.17	8633.22	5865.05	静脉	0.661017
姜荣进	0	65	118	68	25.35	6.42	2900.5	35.7	108.83	2	545.5	2.83	3.18	77.9412	60.2941	9	0.115472	1978.81	4727.51	2748.7	未知	0.576087	0.518987	135.294	116.177	6.5	0.0480435	3938.15	14147.9	10209.8	未知	0.518987
姜荣进2	1	67	124	77	22.1	6.9	2911.5	36.7	111.83	2	560.5	3.83	3.48	86.7647	69.1176	8	0.0922034	2480.54	6180.8	3700.26	动脉	0.621053	0.566265	139.706	122.059	6	0.0429474	3966.26	14788.1	10821.8	静脉	0.566265
王根彩	1	68	133	77	24.27	10.09	4056.2	42.2	91.99	2	286.9	2.78	3.42	82.0588	98.5294	9	0.109677	4236.59	11896.6	7660.03	动脉	0.626966	0.905406	130.882	108.823	7.5	0.0573034	3970.59	12802.8	8832.18	静脉	0.905406
王根彩2	0	73	138	76	22.2	11.09	4156.2	43.2	92.99	2	276.9	3.78	4.42	98.8235	79.7059	7.5	0.0758929	3189.88	9398.79	6208.91	动脉	0.678788	0.615909	145.588	129.412	5.5	0.0377778	3992.21	15188.1	11195.9	静脉	0.615909
王根彩3	1	64	123	79	22.9	12.09	4133.2	44.2	93.99	2	296.9	2.88	3.82	92.9412	79.4118	8	0.0860759	3289.36	7865.48	4576.12	动脉	0.718182	0.710527	129.412	111.765	6	0.0463636	3810.55	13447.2	9636.68	静脉	0.710527
徐爱卿	1	75	146	78	22.98	7.5	5584.9	32.2	50.98	2	303.2	2.67	6.16	97.3529	83.8235	8	0.0821753	3855.97	9398.79	5542.82	动脉	0.752272	0.77027	129.412	108.823	7	0.0540909	3771.63	12272.9	8501.3	静脉	0.77027
徐爱卿2	0	71	144	76	22.8	7.6	5484.9	34.2	51.98	2	313.2	3.67	5.16	107.353	72.3529	8.5	0.0791781	3618.08	8641.87	5023.79	动脉	0.811111	0.647368	132.353	111.765	7	0.0528889	3775.95	12644.9	8868.94	静脉	0.647368
周怀国	0	67	129	69	24.09	20	6369	29.5	40.95	2	423.4	2.38	3.47	95.8824	73.8235	7.5	0.0782208	3358.56	8987.89	5629.32	动脉	0.881082	0.796825	108.823	92.6471	5.5	0.0505406	2781.14	9186.85	6405.71	静脉	0.796825
周怀国2	1	97	133	77	24.74	19	6269	30	42.95	2	424.4	2.68	3.37	97.6471	71.1765	9	0.0921686	3990.05	10421.7	6431.66	动脉	0.869111	0.620513	112.353	114.706	6	0.0534032	4124.13	13823.5	9699.39	静脉	0.620513
黄芝香	1	54	143	87	26.21	7	5780.6	23.9	36.56	2	303.6	3.67	6.02	93.2353	72.6471	7	0.0750789	3440.74	9948.1	6507.35	动脉	0.742389	0.581177	125.588	125	7	0.0557377	4400.95	16165.7	11764.7	静脉	0.581177
黄芝香2	0	56	145	83	23.6	7.1	5680.6	24.1	37.56	2	308.6	3.57	6.12	72.0588	55.8824	5.5	0.0763266	1840.4	4504.76	2664.36	未知	0.662162	0.612904	108.823	91.1765	6	0.0551352	3289.36	9593.43	6304.07	未知	0.612904
黄芝香3	1	58	147	79	22.5	7.3	5760.6	24.9	31.56	2	313.6	3.77	6.32	117.647	74.1176	8	0.068	3851.64	10337.4	6485.73	动脉	0.930233	0.672	126.471	110.294	5.5	0.0434884	3414.79	12487	9072.23	静脉	0.672
黄芝香4	1	55	153	67	21.5	6.8	5766.6	22.9	34.56	2	311.6	3.47	6.08	82.3529	61.7647	7	0.085	2547.58	5501.73	2954.15	动脉	0.823529	0.724138	100	85.2941	5	0.05	2138.84	7532.44	5393.6	静脉	0.724138
朱卸玉	1	77	153	76	28	6.64	2145.6	15.8	65.11	2	603.9	2.37	5.78	105.882	79.4118	9	0.085	3754.33	8786.76	5032.44	动脉	1	0.915255	105.882	86.7647	6.5	0.0613889	2880.62	8814.88	5934.26	静脉	0.915255
王圣祥2	0	51	137	77	26	14.55	9736.4	182.9	173.65	2	337.2	1.48	5.17	104.412	79.4118	8.5	0.0814084	3432.09	8181.23	4749.13	动脉	0.917313	0.692308	113.823	114.706	6.5	0.057106	3851.64	12846	8994.38	静脉	0.692308
王圣祥	0	43	140	80	28.9	14.15	9936.4	192.9	171.65	2	347.2	1.38	5.27	100	76.4706	8	0.08	3408.3	8012.54	4604.24	动脉	0.845771	0.65	118.235	117.647	7	0.059204	3652.68	13786.8	10134.1	静脉	0.65
王圣祥2	0	51	137	77	26	14.55	9736.4	182.9	173.65	2	337.2	1.48	5.17	104.412	79.4118	8.5	0.0814084	3432.09	8181.23	4749.13	动脉	0.917313	0.692308	113.823	114.706	6.5	0.057106	3851.64	12846	8994.38	静脉	0.692308
杨建良	0	63	156	101	26.5	5.63	8970.9	113.8	112.16	2	223.1	0.9	2.97	98.8235	76.7647	7.5	0.0758929	3542.39	9160.9	5618.51	动脉	0.772413	0.7867	127.941	110.294	6	0.0468965	3615.92	12389.7	8773.79	静脉	0.7867
杨建良2	1	66	154	131	28.6	5.83	8870.9	123.8	118.16	2	253.1	1.1	3.97	101.471	76.4706	8.5	0.0837681	3481.83	7962.8	4480.97	动脉	0.775281	0.6753	130.882	113.235	6	0.0458427	3680.8	13231	9550.17	静脉	0.6753
杨建良3	0	61	158	89	27.2	5.93	8770.9	133.8	122.16	2	263.1	2.9	3.17	82.3529	60.2941	7.5	0.0910715	2640.57	5443.34	2802.77	动脉	0.861538	0.7885	95.5882	76.4706	6.5	0.068	2761.68	6942.04	4180.36	静脉	0.7885
杨建良4	1	62	151	83	24.12	5.63	8970.9	103.8	112.16	2	223.1	0.9	2.97	91.7647	82.6471	6.5	0.0708333	3308.82	10030.3	6721.45	动脉	0.751807	0.8873	122.059	104.412	6	0.0491566	3615.92	12750.9	9134.95	静脉	0.8873
杨建良5	0	63	156	101	26.5	5.73	8870.9	113.8	113.16	2	213.1	1.3	3.97	116.177	82.6471	8	0.0688607	3931.66	10590.4	6658.74	动脉	0.76699	0.6923	151.471	133.823	6	0.0396116	3842.99	14917.8	11074.8	静脉	0.6923
余兰香	1	70	147	84	25.84	8.5	5851.8	20.1	30.37	2	246.6	1.12	3.25	89.7059	67.6471	7.5	0.0836065	2817.91	6371.11	3553.2	动脉	0.871429	0.807018	102.941	83.8235	6.5	0.0631428	2722.75	8010.38	5287.63	静脉	0.807018
余兰香2	0	72	148	83	24.9	8.6	5651.8	20.3	31.37	2	256.6	1.42	3.75	97.3529	77.9412	10	0.102719	3821.37	8189.88	4368.51	动脉	0.778823	0.726028	125	107.353	6	0.048	3202.85	11343	8140.14	静脉	0.726028
余兰香3	1	74	149	88	26.05	7.9	5751.8	21	33.37	2	276.6	1.92	4.25	105.882	79.4118	9	0.085	3695.93	8012.54	4316.61	动脉	0.847059	0.760563	125	104.412	7	0.056	3477.51	11410	7932.53	静脉	0.760563
余兰香4	0	78	141	77	28.3	7.8	5351.8	23.3	32.37	2	245.6	1.42	2.25	81.7647	78.2353	8	0.0978417	3416.95	9426.9	6009.95	动脉	0.71282	0.818462	114.706	95.5882	6.5	0.0566667	3488.32	9671.28	6182.96	静脉	0.818462
李玉红6	1	71	169	73	24.6	7.9	7476.8	228.4	265.77	2	300.6	3.27	5.69	91.1765	72.0588	7.5	0.082258	2826.56	6548.44	3721.89	未知	0.746988	0.710145	122.059	101.471	7	0.0573494	3622.4	11338.7	7716.26	未知	0.710145
李玉红	1	61	163	79	25.7	7.4	7376.8	218.4	261.77	2	298.6	2.27	5.99	99.1176	84.1176	8.5	0.0857567	3955.45	10430.4	6474.91	动脉	0.717021	0.72405	138.235	116.177	7.5	0.0542553	4883.22	15486.6	10603.4	静脉	0.72405
李玉红2	0	63	156	74	26.5	7.7	7276.8	223.4	271.77	2	303.6	3.27	6.01	81.4706	77.9412	8	0.0981949	3605.1	8293.68	4688.58	动脉	0.537864	0.595506	151.471	130.882	7	0.0462136	4714.53	16596	11881.5	静脉	0.595506
李玉红3	1	67	157	73	24.4	6.9	7288.8	228.4	264.77	2	313.6	3.27	5.79	100.588	97.0588	9	0.0894737	4256.06	11327.9	7071.8	动脉	0.743478	0.868421	135.294	111.765	8	0.0591304	4822.66	14615.1	9792.39	静脉	0.868421
李玉红4	1	61	163	79	25.7	7.4	7376.8	218.4	261.77	2	298.6	2.27	5.99	95.8824	82.3529	8	0.0834355	3592.13	8804.07	5211.94	动脉	0.686316	0.691358	139.706	119.118	7	0.0501053	3998.7	14636.7	10638	静脉	0.691358
李玉红5	0	65	167	61	26	7.8	7276.8	222.4	259.77	2	301.6	2.37	6.12	104.412	77.9412	9	0.0861972	3728.37	8293.68	4565.31	动脉	0.731959	0.646342	142.647	120.588	7.5	0.0525773	4405.28	14599.9	10194.6	静脉	0.646342
李玉红6	1	71	169	73	24.6	7.9	7476.8	228.4	265.77	2	300.6	3.27	5.69	91.1765	72.0588	7.5	0.082258	2826.56	6548.44	3721.89	未知	0.746988	0.710145	122.059	101.471	7	0.0573494	3622.4	11338.7	7716.26	未知	0.710145
戴珠琴	1	70	124	60	24.89	9.1	8254.7	60.2	64.8	2	352.8	1.86	4.17	97.0588	77.9412	7.5	0.0772727	2846.02	7720.59	4874.57	未知	0.985075	1.10417	98.5294	70.5882	9.5	0.0964179	3382.35	6961.5	3579.15	未知	1.10417
戴珠琴2	0	66	128	78	24.6	9.3	8224.7	61.2	65	2	342.8	1.91	4.05	113.235	73.8235	10	0.0883117	3890.57	9154.41	5263.84	动脉	0.802083	0.612195	141.177	120.588	7	0.0495833	4292.82	15181.7	10888.8	静脉	0.612195
戴珠琴2	0	66	128	78	24.6	9.3	8224.7	61.2	65	2	342.8	1.91	4.05	113.235	73.8235	10	0.0883117	3890.57	9154.41	5263.84	动脉	0.802083	0.612195	141.177	120.588	7	0.0495833	4292.82	15181.7	10888.8	静脉	0.612195
占根法	0	52	130	76	26.06	6.57	10023.7	36	31.75	2	384.5	3.93	3.24	82.3529	57.3529	8.5	0.103214	2811.42	5350.35	2538.93	动脉	0.70886	0.6	116.177	95.5882	7	0.0602531	3624.57	10583.9	6959.34	静脉	0.6
占根法2	1	55	133	77	26.07	6.77	11123.7	42	33.75	2	394	4.03	3.14	91.1765	67.6471	10	0.109677	3217.99	6775.52	3557.53	动脉	0.596154	0.5111	152.941	132.353	7	0.0457692	4604.24	17593	12988.8	静脉	0.5111
占根法3	0	60	138	71	25.3	6.17	10123.7	39	51.75	2	378.5	3.53	3.54	75	52.9412	7.5	0.1	2400.52	4560.99	2160.47	动脉	0.82258	0.7059	91.1765	75	5.5	0.0603226	2467.56	6721.45	4253.89	静脉	0.7059
占根法4	0	52	130	76	26.06	6.57	10023.7	36	31.75	2	384.5	3.93	3.24	104.412	70.8824	8	0.0766197	3488.32	8626.73	5138.41	动脉	0.669811	0.6044	155.882	133.823	7.5	0.0481132	4675.61	18494.8	13819.2	静脉	0.6044
占根法5	0	57	132	70	26.2	6.37	10013.7	37	32.75	2	364.5	4.93	3.44	105.882	82.3529	8	0.0755555	3488.32	8657.01	5168.68	动脉	0.679245	0.6087	155.882	135.294	7	0.0449056	4279.84	17923.9	13644	静脉	0.6087
崔莲香	1	64	150	78	21.39	21.3	13672.5	9300	6014.12	3	339.1	1.12	6.38	93.2353	86.7647	9	0.09653	3847.32	9662.63	5815.31	未知	0.689131	0.837974	135.294	116.177	6.5	0.0480435	3977.08	14173.9	10196.8	未知	0.837974
范建龙	0	67	143	88	22.5	5.86	6059.8	359.2	524.1	3	374	1.17	4.22	97.3529	82.3529	8.5	0.0873112	3527.25	8639.71	5112.46	动脉	0.778823	0.777777	125	105.882	6.5	0.052	3490.48	11877.2	8386.68	静脉	0.777777
叶杏香	1	66	150	98	22.48	6.36	6974.2	1822.9	2311.03	3	103.7	1.57	3.84	82.3529	58.8235	8	0.0971429	2709.78	5523.36	2813.58	动脉	0.727272	0.853081	113.235	124.118	6.5	0.0574026	3183.39	9883.22	6699.83	静脉	0.625
叶杏香2	0	61	145	67	22.7	6.76	6874.2	1722.9	2211.03	3	104.7	2.57	3.94	105.882	79.4118	9	0.085	3983.56	8682.96	4699.39	动脉	0.827586	0.921053	127.941	111.765	5.5	0.0429885	3650.52	12766	9115.48	静脉	0.7105
叶杏香3	1	67	142	88	22.8	6.56	6914.2	1832.9	2411.03	3	113.7	1.67	3.64	102.941	83.8235	6.5	0.0631428	2826.56	8243.94	5417.39	未知	0.933334	1.06557	110.294	89.7059	7	0.0634667	3241.78	9336.07	6094.29	未知	N/A
方银福	0	60	165	102	27.16	6.5	5827.7	1544.8	2343.76	3	440.2	1.94	3.72	95.5882	64.7059	7.5	0.0784616	3693.77	6641.44	2947.66	动脉	0.759345	1.09677	125.882	91.1765	6	0.0476635	2631.92	8782.44	6150.52	静脉	0.7097
方银福2	1	65	148	93	25	6.7	5727.7	1444.8	2243.76	3	450.2	2.94	3.72	100	73.5294	9	0.09	3542.39	7640.57	4098.18	未知	0.862944	1.05246	115.882	89.7059	5.5	0.0474619	2281.57	8217.99	5936.42	未知	N/A
龚杰	0	34	143	89	27.4	9.49	5334.1	298.7	495.12	3	186.4	9.91	3.16	94.4118	83.8235	7	0.0741433	3298.01	9059.26	5761.25	动脉	0.812658	0.954546	116.177	97.0588	6.5	0.0559494	3280.71	10728.8	7448.1	静脉	0.8636
龚杰2	0	38	138	86	25.8	10.49	5234.1	300.7	515.12	3	176.4	10.91	7.16	92.6471	69.1176	8	0.0863492	2753.03	6916.09	4163.06	动脉	0.67742	0.5949	136.765	116.177	7	0.0511828	4316.61	15017.3	10700.7	静脉	0.5949
龚杰3	1	41	143	77	23.7	8.49	5354.1	299.7	496.12	3	187.4	9.01	5.16	73.5294	50	8	0.1088	2253.46	4418.25	2164.79	动脉	0.554323	0.6667	132.647	125	8	0.0603104	2104.24	6548.44	4444.2	静脉	0.6667
李建雄	0	41	135	88	32.04	4.62	3607.9	736.8	1805.65	3	490.5	1.51	3.43	92.6471	60.2941	11	0.11873	3531.57	6725.78	3194.2	动脉	0.649485	0.5	142.647	120.588	7.5	0.0525773	4658.3	14593.4	9935.12	静脉	0.5
王爱琴	1	84	143	74	23.06	7.6	5000.9	238.7	422.03	3	306.4	3.68	5.45	91.1765	64.7059	9	0.0987096	2826.56	6083.48	3256.92	动脉	0.691965	0.6769	131.765	95.5882	5.5	0.0417411	2275.09	9251.73	6976.64	静脉	0.6769
王爱琴2	0	80	141	79	24.06	7.7	5100.9	248.7	433.03	3	316.4	4.68	6.45	91.1765	64.7059	9	0.0987096	2461.07	5413.06	2951.99	动脉	0.805195	0.6769	113.235	95.5882	6	0.052987	2727.08	9439.88	6712.8	静脉	0.6769
王爱琴3	1	88	143	88	24.03	7.1	4999.9	241.7	428.03	3	316.4	4.08	5.45	72.0588	47.0588	8.5	0.117959	2471.89	4260.38	1788.49	动脉	0.57647	0.4444	125	115.882	6.5	0.052	4000.86	12582.2	8581.31	静脉	0.4444
王爱琴4	0	82	148	66	20.7	7.3	5088.9	218.7	412.03	3	299.4	3.18	5.15	70.5882	47.0588	8	0.113333	2415.66	4132.79	1717.13	动脉	0.517241	0.4444	136.471	105.882	7	0.0512931	3968.43	12623.3	8654.84	静脉	0.4444
巫坤萍2	0	69	146	78	24.6	6.5	5240	383.3	641.21	3	419.2	1.4	3.76	86.7647	60.2941	9	0.103729	2660.03	5371.97	2711.94	动脉	0.657016	0.6029	132.059	120	7.5	0.0567929	3970.59	11429.5	7458.91	静脉	0.6029
巫坤萍	1	74	152	76	25.56	6.9	5340	393.3	651.21	3	409.2	1.5	3.66	92.9412	79.4118	8	0.0860759	3386.68	8133.65	4746.97	动脉	0.619608	0.6136	150	129.412	8	0.0533333	4796.71	16096.5	11299.7	静脉	0.6136
巫坤萍2	0	69	146	78	24.6	6.5	5240	383.3	641.21	3	419.2	1.4	3.76	86.7647	60.2941	9	0.103729	2660.03	5371.97	2711.94	动脉	0.657016	0.6029	132.059	120	7.5	0.0567929	3970.59	11429.5	7458.91	静脉	0.6029
巫坤萍3	1	78	159	76	25.3	6.6	5240	373.3	640.21	3	411.2	1.2	3.16	80.8824	58.8235	7.5	0.0927272	2461.07	5049.74	2588.67	动脉	0.719896	0.8889	112.353	116.177	5.5	0.0489529	2102.08	5376.3	3274.22	静脉	0.8889
巫坤萍4	0	71	150	71	23.6	6.7	5333	373.3	647.21	3	429.2	1.31	3.56	73.5294	51.4706	6.5	0.0884	1978.81	3953.29	1974.48	动脉	0.520833	0.4321	141.177	129.118	7.5	0.053125	3823.53	13577	9753.46	静脉	0.4321
杨金海	0	63	161	84	26.73	7.7	9035.6	2377.6	2326.59	3	329.8	1.93	3.25	90.2941	85.2941	8.5	0.0941368	3711.07	9474.48	5763.41	动脉	0.626531	0.6905	144.118	123.529	7	0.0485714	4245.24	15188.1	10942.9	静脉	0.6905
杨金海	1	62	154	79	27.9	7.9	9135.6	2277.6	2426.59	3	333.8	2.93	6.85	93.2353	88.2353	8.5	0.0911672	3929.5	9753.46	5823.96	动脉	0.681721	0.7595	136.765	126.177	7	0.0511828	4392.3	14697.2	10304.9	静脉	0.7595
杨金海2	0	63	161	84	26.73	7.7	9035.6	2377.6	2326.59	3	329.8	1.93	3.25	88.8235	82.3529	9	0.101325	3964.1	9210.64	5246.54	动脉	0.681715	0.8615	130.294	125.588	5	0.0383747	2740.05	9863.75	7123.7	静脉	0.8615
杨金海2	0	63	161	84	26.73	7.7	9035.6	2377.6	2326.59	3	329.8	1.93	3.25	88.8235	82.3529	9	0.101325	3964.1	9210.64	5246.54	动脉	0.681715	0.8615	130.294	125.588	5	0.0383747	2740.05	9863.75	7123.7	静脉	0.8615
杨金海3	0	69	145	82	24.73	8.1	8995.6	2177.6	2126.59	3	319.8	1.73	3.4	87.3529	80.8824	9	0.10303	3858.13	8728.37	4870.24	动脉	0.652747	0.6962	133.823	116.177	7	0.0523077	4091.7	14331.7	10240.1	静脉	0.6962
虞湖滨	0	54	161	95	28.83	9.19	13855.2	791.8	505.29	3	469.7	2.07	5.25	72.0588	48.5294	8	0.11102	1790.66	3576.99	1786.33	动脉	0.653333	0.5077	110.294	125.588	6	0.0544	2841.7	9204.15	6362.46	静脉	0.5077
虞湖滨2	1	58	145	90	23.7	8.19	13155.2	777.8	499.29	3	439.7	2.17	4.25	108.823	82.3529	9	0.0827027	3546.71	8501.3	4954.58	动脉	0.691589	0.5957	157.353	138.235	6.5	0.0413084	4666.95	17577.9	12910.9	静脉	0.5957
虞湖滨3	0	54	151	95	28.83	9.19	13855.2	791.8	505.29	3	469.7	2.07	5.25	86.7647	66.1765	7	0.080678	2874.13	6351.64	3477.51	动脉	0.561905	0.4592	154.412	144.118	4.5	0.0291429	3819.2	20067	16247.8	静脉	0.4592
詹友清	0	61	132	62	26.61	6.33	2982.7	823.6	2441.43	3	357.5	0.99	2.31	95.5882	66.1765	10	0.104615	3538.06	6805.8	3267.73	动脉	0.742009	0.7377	128.823	109.706	6.5	0.0504566	3021.19	9050.61	6029.41	静脉	0.7377
周金林	0	83	154	94	23.43	6.83	7248.6	1379.3	1682.45	3	473.8	1.37	3.68	88.2353	63.2353	8.5	0.0963333	2915.22	5806.66	2891.44	动脉	0.618557	0.5244	142.647	120.588	7.5	0.0525773	4647.49	15769.9	11122.4	静脉	0.5244
詹友清2	0	68	136	68	26.5	6.77	2582.7	813.6	2341.43	3	337.5	0.77	1.31	92.6471	61.7647	9.5	0.10254	3631.06	6849.05	3217.99	动脉	0.741177	0.5915	125	104.412	7	0.056	3542.39	11280.3	7737.89	静脉	0.5915
周金林	0	83	154	94	23.43	6.83	7248.6	1379.3	1682.45	3	473.8	1.37	3.68	88.2353	63.2353	8.5	0.0963333	2915.22	5806.66	2891.44	动脉	0.618557	0.5244	142.647	120.588	7.5	0.0525773	4647.49	15769.9	11122.4	静脉	0.5244
周金林2	0	82	140	86	22.6	7.83	7148.6	1279.3	1582.45	3	456.8	1.03	3.68	83.8235	58.8235	7.5	0.0894737	2891.44	5590.4	2698.96	动脉	0.665887	0.678	125.882	126.765	6.5	0.0516355	3179.07	8923.01	5743.94	静脉	0.678
余俊	0	48	158	110	27.41	10.62	11442.8	148.2	114.51	2	243.5	0.68	4.47	104.412	73.8235	10	0.0957746	3310.99	8923.01	5612.02	动脉	0.747369	0.6867	139.706	122.059	6	0.0429474	4126.3	14403.1	10276.8	静脉	0.6867
余俊2	1	51	155	109	29.6	11.62	11332.8	138.2	104.51	2	213.5	0.48	4.37	89.7059	73.2353	9	0.100328	3083.91	6133.22	3049.31	动脉	0.61	0.4886	147.059	129.412	6	0.0408	4130.62	15586.1	11455.4	静脉	0.4886
余俊3	0	56	151	93	26.1	10.42	11358.8	132.2	107.51	2	233.5	0.7	4.67	85.2941	63.2353	7.5	0.0879311	2804.93	5821.8	3016.87	动脉	1	0.9348	85.2941	67.6471	6	0.0703448	1963.67	5547.15	3583.48	静脉	0.9348
余俊4	0	49	145	67	27	9.62	10442.8	152.2	113.51	2	203.5	0.58	4.17	108.823	78.2353	7	0.0643243	3029.84	8535.9	5506.06	动脉	0.860465	0.8108	126.471	108.823	6	0.0474419	3540.22	12497.8	8957.61	静脉	0.8108
季志耀	0	81	164	93	23.26	8.32	3793.2	896.8	2090.39	3	396.9	1.51	4.56	100	77.9412	7.5	0.075	3179.07	7740.05	4560.99	动脉	0.750552	0.8154	133.235	115.588	7	0.0525386	3163.93	10292	7128.03	静脉	0.8154
季志耀3	0	75	147	74	25.45	9.32	3593.2	876.8	1990.39	3	346.9	1.01	4.16	97.0588	73.5294	8	0.0824243	3365.05	7536.76	4171.71	动脉	0.706638	0.8333	137.353	128.235	6.5	0.0473234	2861.16	8793.25	5932.09	静脉	0.8333
季志耀2	0	78	161	88	23	8.12	3693.2	996.8	2190.39	3	366.9	1.48	4.33	101.471	77.9412	8	0.0788406	3310.99	8094.72	4783.74	动脉	0.770089	0.8281	131.765	124.118	7	0.053125	2830.88	9240.92	6410.03	静脉	0.8281
季志耀3	0	75	147	74	25.45	9.32	3593.2	876.8	1990.39	3	346.9	1.01	4.16	97.0588	73.5294	8	0.0824243	3365.05	7536.76	4171.71	动脉	0.706638	0.8333	137.353	128.235	6.5	0.0473234	2861.16	8793.25	5932.09	静脉	0.8333
郑仁昌	0	73	134	87	26.06	17.5	4540.8	1354.9	2638.23	3	451.1	0.97	7.07	100	73.5294	9	0.09	3330.45	7422.15	4091.7	动脉	0.767494	0.8333	130.294	88.2353	7.5	0.0575621	3555.36	9792.39	6237.02	静脉	0.8333
郑仁昌2	0	71	122	67	22.4	18.5	4240.8	1254.9	2538.23	3	441.1	0.17	6.07	83.2353	88.2353	7.5	0.090106	4128.46	10224.9	6096.45	动脉	0.623348	0.8955	133.529	128.529	8.5	0.0636564	4173.88	11883.7	7709.77	静脉	0.8955
郑仁昌	0	73	134	87	22.3	195	4440.8	1354.9	2438.23	3	411.1	0.87	5.07	89.1176	92.6471	8	0.089769	4225.78	10942.9	6717.13	动脉	0.688636	0.875	129.412	105.882	8	0.0618182	4178.2	12259.9	8081.75	静脉	0.875
